# Supplementary material for: Determinants Influenced by COVID-19 Vaccine: Employing the Health Action Process Approach and the Belief in Conspiracy Theories
Source: MDPI journal article supplement (doi:10.3390/vaccines11040730), 2023-03-25
Supplement: s1 [file s1]

## Determinants Influenced by COVID-19 Vaccine: Employing the Health Action Process Approach and the Belief in Conspiracy Theories

Table S1. Items used in the study.

| Factor                   | Code | Items                                                                                                                                                                                               | References |
|--------------------------|------|-----------------------------------------------------------------------------------------------------------------------------------------------------------------------------------------------------|------------|
| COVID-19 thread          | PT1  | I have no competence to use healthcare technology during COVID-19 pandemic.                                                                                                                         | 19,20,21   |
|                          | PT2  | Experienced loved ones dying from COVID-19 pandemic.                                                                                                                                                |            |
|                          | PT3  | I do not feel comfortable using healthcare technology during COVID-19 pandemic.                                                                                                                     |            |
|                          | PT4  | I have no access to medical care during COVID-19 pandemic.                                                                                                                                          |            |
| Openness to experience   | OE1  | I am curious with COVID-19 vaccine.                                                                                                                                                                 | 22,23      |
|                          | OE2  | I am quickly understanding COVID-19 vaccine                                                                                                                                                         |            |
|                          | OE3  | I like to present some new ideas                                                                                                                                                                    |            |
| Government communication | GC1  | Government COVID-19 Vaccine communication strategy helps individuals get correct, consistent and timely information on the new COVID-19 vaccine                                                     | 26,27      |
|                          | GC2  | Government COVID-19 Vaccine communication strategy helps to reduce vaccine hesitancy.                                                                                                               |            |
|                          | GC3  | Government COVID-19 Vaccine communication strategy helps individuals to receive the vaccine with confidence.                                                                                        |            |
|                          | GC4  | Government COVID-19 Vaccine communication strategy helps build an enabling environment to adopt and maintain COVID-19 appropriate behaviors to reduce infection risks during vaccination processes. |            |
| Pandemic knowledge       | PK1  | The COVID-19 may transmit through human-to-human interaction.                                                                                                                                       | 29,30,31   |
|                          | PK2  | The COVID-19 may also transmit through a common point of contact (door, table surface, etc.).                                                                                                       |            |
|                          | PK3  | The COVID-19 may transmit through handshake and communication with the carrier of this disease.                                                                                                     |            |
|                          | PK4  | The initial symptoms of COVID-19 include fever, dry cough, sneezing, body aches, and breathing distress, etc.                                                                                       |            |
|                          | PK5  | The infectious diseases may be prevented if we keep ourselves clean.                                                                                                                                |            |
|                          | PK6  | Disease (COVID-19) can be prevented                                                                                                                                                                 |            |

|                               |      |                                                                                                                                                                               |          |
|-------------------------------|------|-------------------------------------------------------------------------------------------------------------------------------------------------------------------------------|----------|
|                               |      | through continual handwashing.                                                                                                                                                |          |
|                               | PK7  | The COVID-19 enters the human body through the nasal (nose) and oral (mouth) cavity as well as the eyes.                                                                      |          |
|                               | PK8  | The COVID-19 can be prevented through social distancing.                                                                                                                      |          |
| Descriptive norm              | DN1  | My family members think I should take-up COVID-19 vaccine                                                                                                                     | 32,33    |
|                               | DN2  | I know that my family members take-up COVID-19 vaccine.                                                                                                                       |          |
|                               | DN3  | My relatives think that I should take-up COVID-19 vaccine.                                                                                                                    |          |
|                               | DN4  | I know that my relative take-up COVID-19 vaccine.                                                                                                                             |          |
| Belief in conspiracy theory   | BCT1 | I believe the government keeps many important secrets about the COVID-19 vaccine from the public.                                                                             | 14,16,17 |
|                               | BCT2 | I believe the COVID-19 viruses and/or diseases have been deliberately disseminated to infect certain populations.                                                             |          |
|                               | BCT3 | I believe the rapid spread of COVID-19 viruses and/or diseases is the result of the deliberate, concealed efforts of some organization.                                       |          |
|                               | BCT4 | I believe progress toward vaccination to cure COVID-19 is deliberately being hindered.                                                                                        |          |
|                               | BCT5 | I believe groups of scientists manipulate, fabricate, or suppress information about COVID-19 vaccine to deceive the public.                                                   |          |
|                               | BCT6 | I believe a lot of important information regarding vaccination is deliberately concealed from the public out of self-interest.                                                |          |
|                               | BCT7 | I believe the government is involved in the murder of innocent citizens for not taking precautions against the COVID-19 pandemic and not making the vaccine widely available. |          |
| Intention to take-up COVID-19 | INT1 | I have high intention to be immunized with a COVID-19 vaccine                                                                                                                 | 15       |
|                               | INT2 | I take vaccine to protect myself from COVID-19 disease currently.                                                                                                             |          |
|                               | INT3 | I would recommend the COVID-19 vaccine to my friends and colleagues to get protection from COVID-19 disease.                                                                  |          |
|                               | INT4 | Immunizing through COVID-19 vaccine is a pleasant experience for me.                                                                                                          |          |
| Vaccine behavior              | VB1  | I feel pleasing taking-up the COVID-19 vaccine.                                                                                                                               | 34       |
|                               | VB2  | Vaccination helped me to fight against coronavirus.                                                                                                                           |          |

|                        |      |                                                                                                      |       |
|------------------------|------|------------------------------------------------------------------------------------------------------|-------|
|                        | VB3  | Vaccination can be beneficial in managing my health.                                                 |       |
|                        | VB4  | Vaccination provides good value for healthy life style.                                              |       |
| Perceived benefits     | PB1  | Taking-up COVID-19 vaccine has many advantages                                                       | 34,35 |
|                        | PB2  | Taking-up COVID-19 vaccine is useful for me                                                          |       |
|                        | PB3  | COVID-19 vaccine provides a better outcome than traditional medication.                              |       |
| Value co-creation      | VC1  | We interact with individuals to provide better service since taking-up COVID-19 vaccine              | 35,36 |
|                        | VC2  | We interact with individuals to design offers that meet their needs after taking-up COVID-19 vaccine |       |
|                        | VC3  | We co-opt individual's involvement in providing services for them after taking-up COVID-19 vaccine   |       |
|                        | VC4  | We help individuals to get more value since taking-up COVID-19 vaccine                               |       |
| Continuous vaccination | CVN1 | I am likely to resume taking-up vaccine in the future                                                | 37,38 |
|                        | CVN2 | I intend to constantly get vaccinated in the future                                                  |       |
|                        | CVN3 | I intend to resume taking-up vaccine rather than discontinue the vaccine.                            |       |
